# Supplementary material for: 3D crustal stress state of Germany according to a data-calibrated geomechanical model
Source: Copernicus journal article supplement (doi:10.5194/se-12-1777-2021), 2021-08-11
Supplement: Supplementary file 1 [file Supplement_1_database_of_the_top_of_the_crystalline_basement.pdf › Supplement_1_database_of_the_top_of_the_crystalline_basement.pdf]

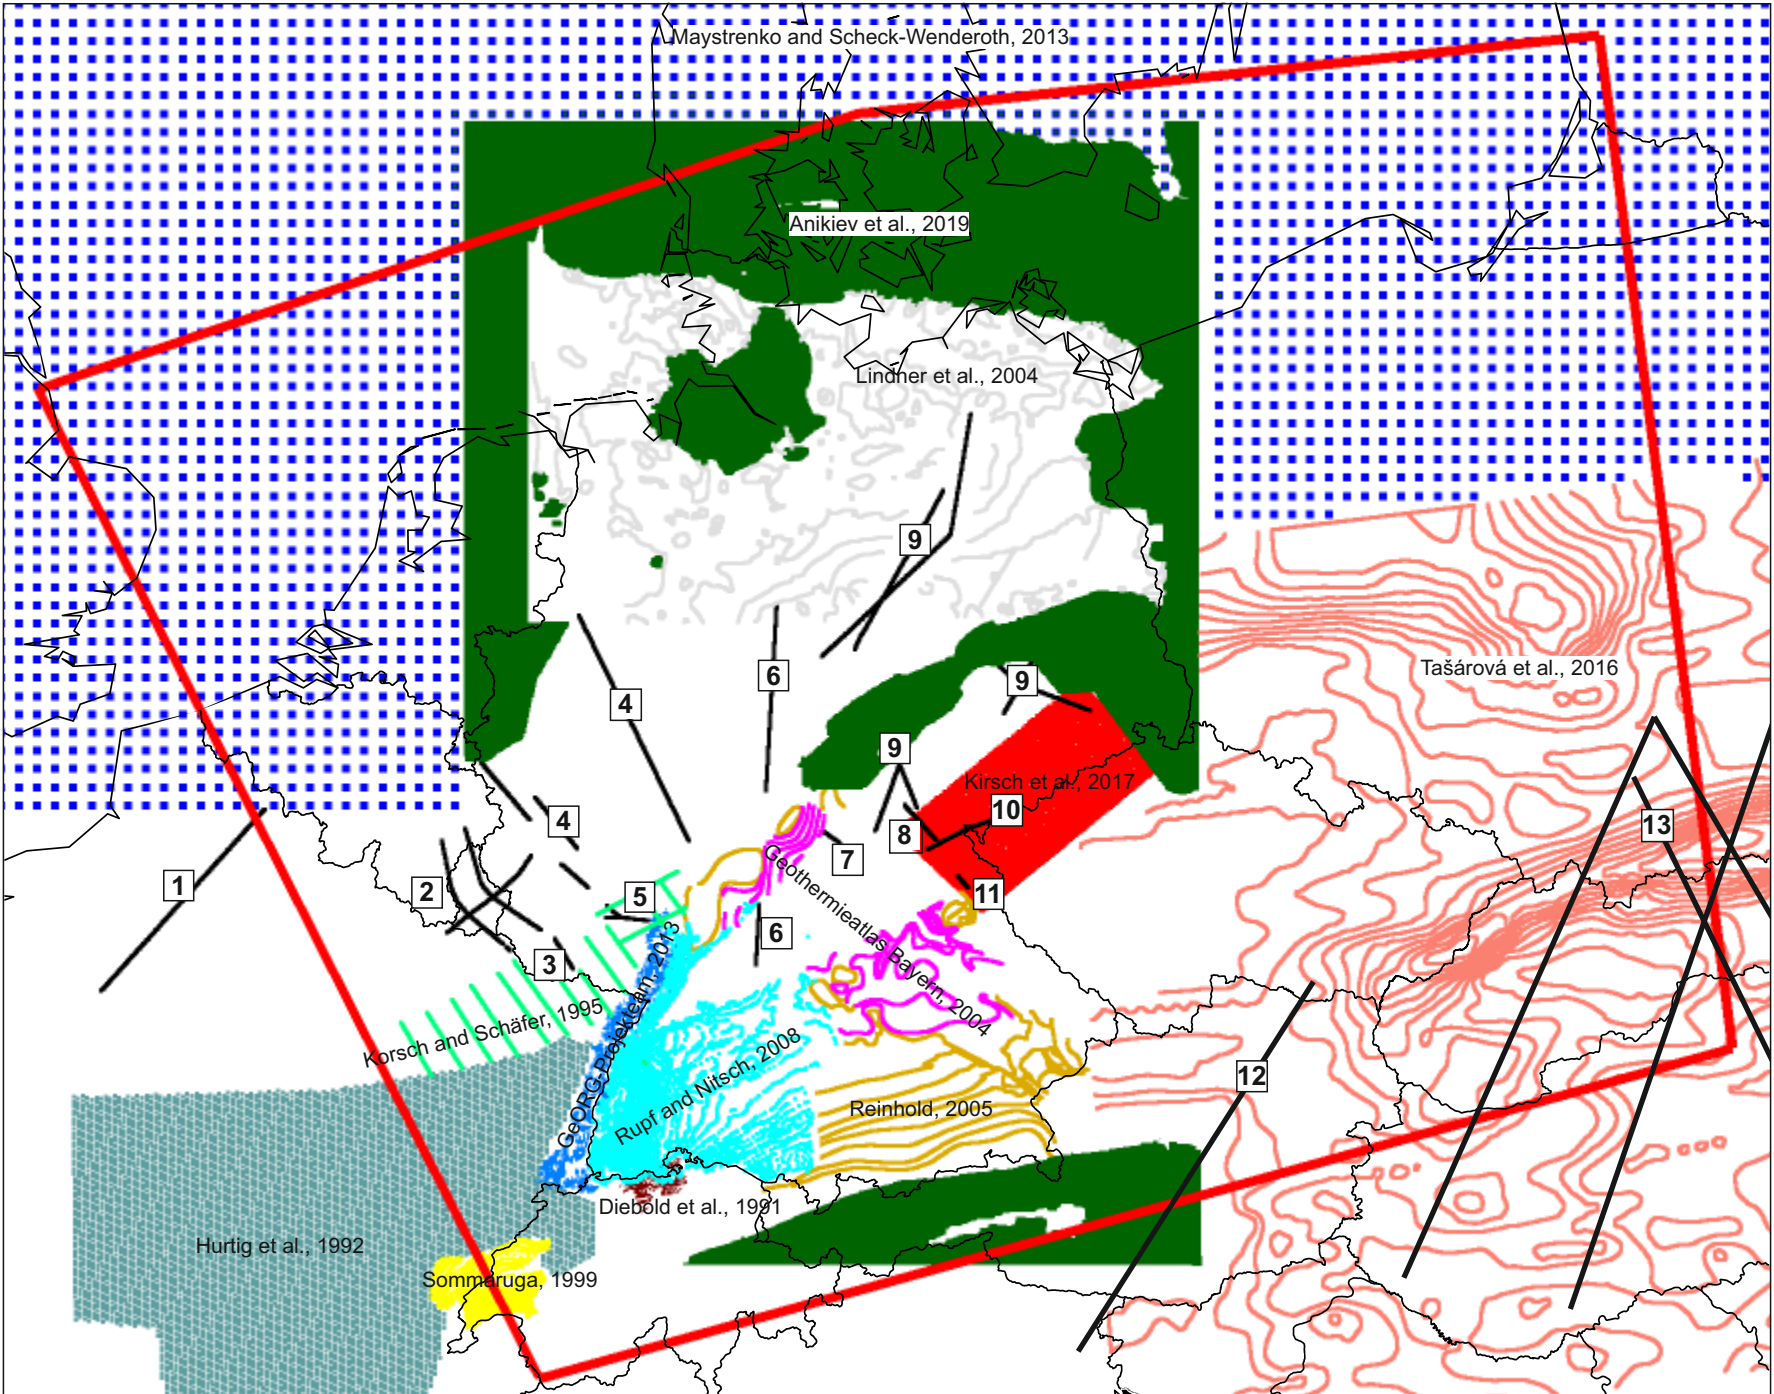

### Black profiles:

|                           |                             |                          |                                |                |
|---------------------------|-----------------------------|--------------------------|--------------------------------|----------------|
| 1 Cazes et al., 1985      | 4 Oncken et al., 2000       | 7 Heinrichs et al., 1994 | 10 Behr et al., 1994           | 13 Janik, 2011 |
| 2 Schintgen, 2015         | 5 Wenzel and Brun, 1991     | 8 Hirschmann, 1996       | 11 Bokelmann and Bianchi, 2018 |                |
| 3 Meschede and Warr, 2019 | 6 Freeman and Mueller, 1992 | 9 Reinhold, 2005         | 12 Grad et al., 2009a          |                |
