# Supplementary material for: 3D crustal stress state of Germany according to a data-calibrated geomechanical model
Source: Copernicus journal article supplement (doi:10.5194/se-12-1777-2021), 2021-08-11
Supplement: Supplementary file [file se-12-1777-2021-supplement-title-page.pdf › se-12-1777-2021-supplement-title-page.pdf]

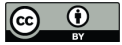

## *Supplement of*

# **3D crustal stress state of Germany according to a data-calibrated geomechanical model**

**Steffen Ahlers et al.**

*Correspondence to:* Steffen Ahlers (ahlers@geo.tu-darmstadt.de)

- se-12-1777-2021-supplement-title-page.pdf
- Supplement\_1\_database\_of\_the\_top\_of\_the\_crystalline\_basement.eps
- Supplement\_1\_database\_of\_the\_top\_of\_the\_crystalline\_basement.pdf

The copyright of individual parts of the supplement might differ from the article licence.
